# Supplementary material for: Anionic engineering of a p-dopant enables efficient and stable perovskite solar cells
Source: Royal Society of Chemistry journal article supplement (doi:10.1039/d4ta03732d), 2024-01-01
Supplement: d4ta03732d1.pdf [file d4ta03732d1.pdf]

1

## Supporting Information

2 **Anionic engineering of a p-dopant enables efficient and stable**  
3 **perovskite solar cells**

4 Correspondence to: [luojs@uestc.edu.cn](mailto:luojs@uestc.edu.cn)

5

## Table of Contents

|    |                                              |
|----|----------------------------------------------|
| 6  |                                              |
| 7  | 1. Materials                                 |
| 8  | 2. Characterization                          |
| 9  | 3. DFT calculations                          |
| 10 | 4. Precursor solution and device fabrication |
| 11 | 5. Figures S1-S16                            |
| 12 | 6. Table S1-S3                               |
| 13 |                                              |

## 1. Materials

FAI (99.8%) were purchased from Greatcell Solar.  $\text{PbI}_2$  (99.999%) and ITO glass were purchased from Advanced Election Technology CO., Ltd. PTAA (99.9%), Spiro-OMeTAD (99.9%), *t*-BP (99%),  $\text{PbBr}_2$  (99.9%), MABr (99.8%) and CsBr (99.9%) were purchased from Xi'an Yuri Solar Co.,Ltd. Lithium tetrakis(pentafluorophenyl)borate ethyl etherate (Li-BCF) was purchased from J&K Scientific. The  $\text{SnO}_2$  (15 wt%) was purchased from Alfa Aesar. The N, N-dimethylformamide (DMF, 99.9%), Li-TFSI (99%), dimethyl sulfoxide (DMSO, 99.9%), chlorobenzene, isopropanol (IPA, 99.9%) and acetonitrile were purchased from Sigma-Aldrich. Ethanol was purchased from Aladdin. All the materials were used as received without any purification.

## 2. Characterization

The ultraviolet-visible absorption spectrum (UV-vis) was measured by a Hitachi UV-visible spectrophotometer (U-2910). The electron spin resonance spectroscopy (ESR) was analyzed by a Bruker-E500 spectrometer. The ultraviolet photoelectron spectroscopy (UPS) measurements were performed by the AXIS ULTRA DLD instrument from Kratos, UK, using a Hel monochromator with 21.22 eV source energy. The steady-state fluorescence spectroscopy (PL) was collected by a Hitachi spectrophotometer (F-4600). The transient fluorescence spectra (TRPL) were measured at room temperature using the time-correlated single photon counting (TCSPC) technique with a FluoroLog-3 modular spectrofluorometer (HORIBA Jobin Yvon). The

36 electrochemical impedance spectroscopy (EIS) of the PSCs under ambient air  
37 was recorded by an electrochemical workstation (CHI 660E, Shanghai,  
38 Chenhua) and a solar simulator (Zolix Instrument Co., Ltd. Beijing). The surface  
39 and cross-sectional morphology of the films were observed by a scanning  
40 electron microscopy (JEOL JSM-7600F). The *J-V* curve of the PSCs was  
41 measured at room temperature using an electrochemical workstation (CHI  
42 660E, Shanghai, Chenhua) under AM 1.5G simulated solar light ( $100 \text{ mW cm}^{-2}$ ),  
43 and the incident light intensity was calibrated with a standard silicon solar  
44 cell. Incident photon-to-electron conversion efficiency (IPCE) spectrum was  
45 measured using a CROWNTECH, QTest Station 2000 IPCE testing system.  
46 Regarding the environmental stability of the PSCs, the devices were kept at  
47 ambient conditions (50-85% room humidity and room temperature) in a dark  
48 environment for 30 days. Regarding the operational stability of PSCs,  
49 unencapsulated PSCs were continuously tested in a standard LED simulated  
50 sunlight, room temperature and  $\text{N}_2$  atmosphere. The water contact angle of the  
51 films was examined by a droplet shape analyzer (Krüss DSA100). The atomic  
52 force microscopy (AFM) measured by Bruker Dimension Icon AFM instrument.  
53 Two dimensional grazing incidence X-ray diffraction (2D-GIXD) images were  
54 conducted at BL14B1 beamline of Shanghai Synchrotron Radiation Facility  
55 (SSRF) ( $\lambda = 1.24 \text{ \AA}$ ). The incidence angle is 0.16 degree and the exposure time  
56 is 60 s. Time-of-flight secondary-ion mass spectrometry (TOF-SIMS) was  
57 performed by TOF.SIMS 5 (IONTOF GmbH, Germany). A dual-beam TOF-

58 SIMS was used with Cs<sup>+</sup> primary ions (0.5 keV, 26 nA, 300 × 300 μm<sup>2</sup> ) for the  
59 erosion and a Bi<sup>+</sup> pulsed primary ion beam for the analysis of anion (30 keV, 1  
60 pA, 100 × 100 μm<sup>2</sup> ).

### 61 **3. DFT calculations**

62 Electrostatic potential (ESP) calculations utilized the Gaussian16, A.03  
63 software package. For geometry optimizations, the B3LYP functional<sup>1</sup> was  
64 employed in conjunction with the Becke-Johnson damping scheme (D3BJ)<sup>2, 3</sup>.  
65 All atoms were modeled using the 6-31G(d,p) basis set<sup>4</sup>.

66 Calculation related to molecular orbitals were performed in the DFT  
67 framework carried out by the Dmol3 program<sup>5</sup> with a Generalized Gradient  
68 Approximation-Perdew Burke Ernzerh (GGA-PBE) exchange correlation  
69 functional<sup>6</sup>. The self-consistent field (SCF) convergence criterion of 1 × 10<sup>-6</sup> Ha  
70 was adopted to the geometry optimization, and the total energy convergence  
71 tolerance and force tolerance were set to be 1 × 10<sup>-5</sup> Ha, 2 × 10<sup>-3</sup> Ha Å<sup>-1</sup>,  
72 respectively.

73 The CP2K program<sup>7</sup> was utilized for the calculations of relaxed models,  
74 electron transfer, and other optimized structures, employing the spin-polarized  
75 density functional theory<sup>8, 9</sup>. A mixed Gaussian and plane-wave basis set was  
76 applied for all calculations. Core electrons were represented using norm-  
77 conserving Goedecker-Teter-Hutter pseudopotentials<sup>10-12</sup>, and van der Waals  
78 interactions were corrected using Grimme's DFT-D3 model<sup>2</sup>. The exchange-  
79 correlation functional was GGA-PBE. Valence electron wavefunctions were

80 expanded using a double-zeta basis set with polarization functions<sup>13</sup>,  
81 supplemented by an auxiliary plane-wave basis set with an energy cutoff of 360  
82 eV. Configurations were optimized via the Broyden-Fletcher-Goldfarb-Shanno  
83 (BGFS) algorithm, achieving a self-consistent field (SCF) convergence criterion  
84 of  $1.0 \times 10^{-6}$  au.

#### 85 **4. Precursor solution and device fabrication**

86 The ITO glass substrates were ultrasonically cleaned with deionized water,  
87 acetone, and ethanol in sequence, each step was more than 30 minutes, and  
88 dried with a nitrogen flow, then treated with UV-ozone for 30 minutes. All the  
89 solutions were passed through a 0.22-mm filter before use. The SnO<sub>2</sub> solution  
90 was prepared by diluting 15 wt% SnO<sub>2</sub> aqueous solutions (400  $\mu$ L) with 1.1 mL  
91 of isopropanol/H<sub>2</sub>O (1/1, v/v). The SnO<sub>2</sub> solution was spin coated onto an ITO  
92 substrate at 3000 rpm for 30 s, and annealed in ambient air at 150 °C for 30  
93 min. 1.2 M Cs<sub>0.05</sub>FA<sub>0.85</sub>MA<sub>0.1</sub>Pb(I<sub>0.95</sub>Br<sub>0.05</sub>)<sub>3</sub> perovskite precursor solution was  
94 prepared in mixture solvent of DMF and DMSO (4:1, v/v). The perovskite  
95 solution was spin coated with a one-step spin-coating process at 1300 rpm for  
96 10 s and 5000 rpm for 45 s, respectively. The spin-coated perovskite precursor  
97 films were sequentially heated at 110 °C. For the control PTAA: Li-TFSI solution,  
98 dissolved 15 mg PTAA in 1 mL of chlorobenzene, added 7.5  $\mu$ L of  
99 bis(trifluoromethane)sulfonamide lithium salt (Li-TFSI)/acetonitrile (170 mg/mL)  
100 and 7.5  $\mu$ L of *t*-BP/acetonitrile (1:1 v/v). The PTAA and Li-BCF were dissolved  
101 into 1 mL CB and mixed by desired Li-BCF/PTAA ratios 5% to 10% (weight

102 ratio). For the control Sprio-OMeTAD: Li-TFSI solution, dissolved 72.3 mg  
103 Sprio-OMeTAD in 1 mL of chlorobenzene, added 17.5  $\mu$ L of Li-TFSI/acetonitrile  
104 (520 mg/mL) and 28.8  $\mu$ L of t-BP. The Sprio-OMeTAD and Li-BCF were  
105 dissolved into 1 mL CB and mixed by desired Li-BCF/Sprio-OMeTAD ratios 2%  
106 to 10% (weight ratio). The HTL solution was spin-coated on the perovskite layer  
107 by spin coating at 3000 rpm for 30 s. Finally, Au electrode was thermally  
108 evaporated.

## 109 5. Figures S1-S11

110

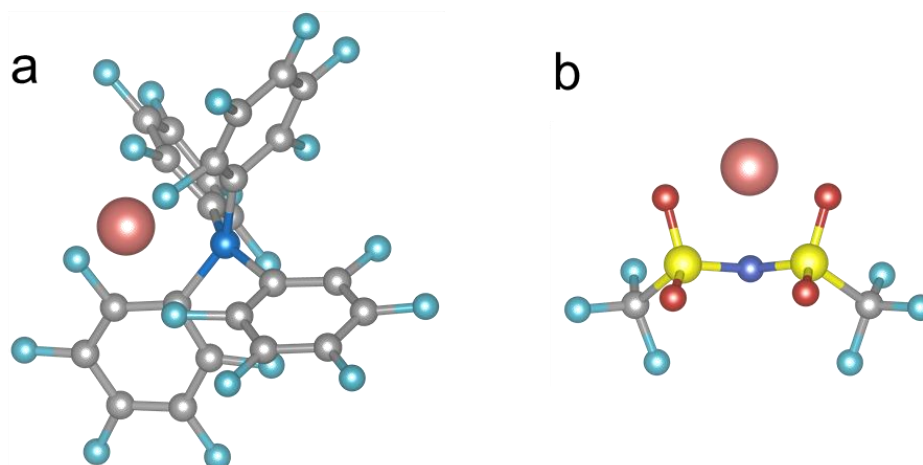

111

112 **Figure S1.** Density functional theory (DFT) calculation results. Optimized  
113 structures of (a) Li-BCF and (b) Li-TFSI.

114

115

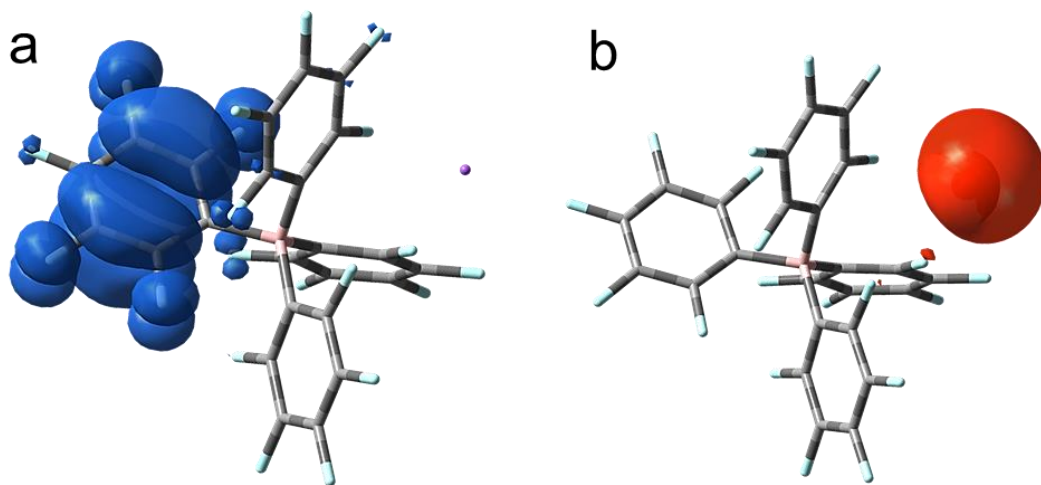

116

117

118 **Figure S2.** Density functional theory (DFT) calculation results. (a) HOMO and  
119 (b) LUMO density of Li-BCF.



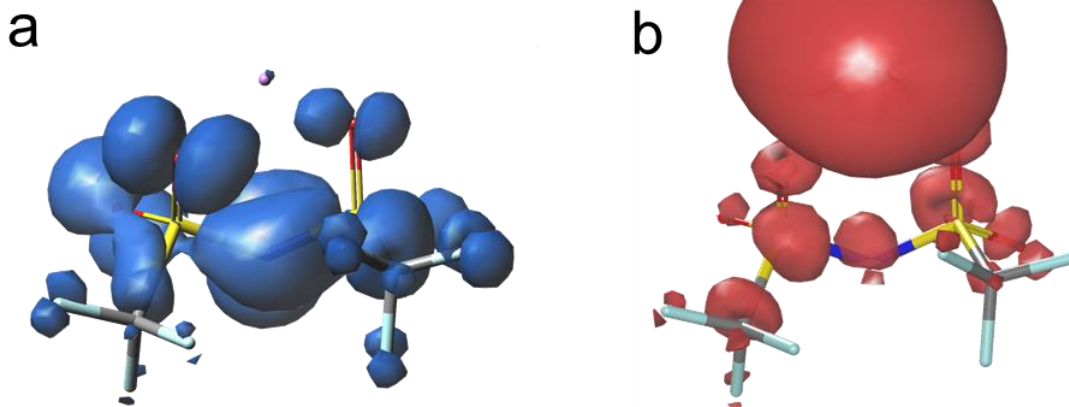

120

121 **Figure S3.** Density functional theory (DFT) calculation results. (a) HOMO and  
 122 (b) LUMO density of Li-TFSI.

123

124

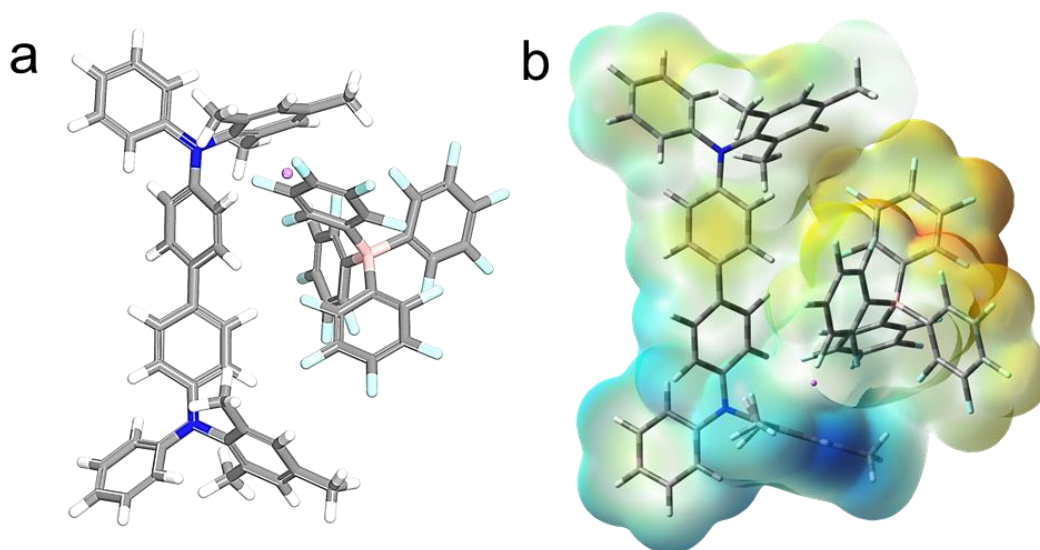

125

126 **Figure S4.** Density functional theory (DFT) calculation results. (a) Optimized  
 127 structure of the Li-BCF/PTAA dimer interaction model and (b) its corresponding  
 128 Electrostatic potential (ESP) surface.

129

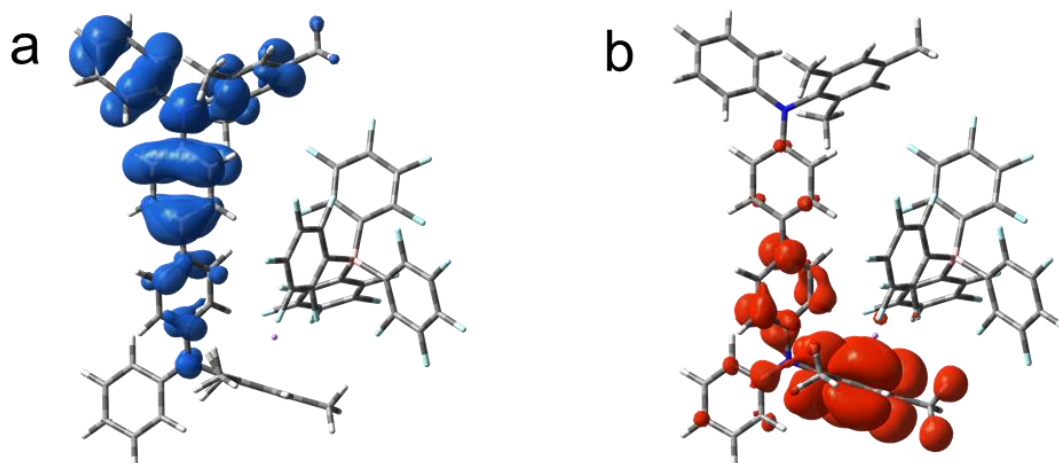

130

131 **Figure S5.** Density functional theory (DFT) calculation results. (a) HOMO and  
 132 (b) LUMO density of Li-BCF/PTAA dimer interaction model.

133

134

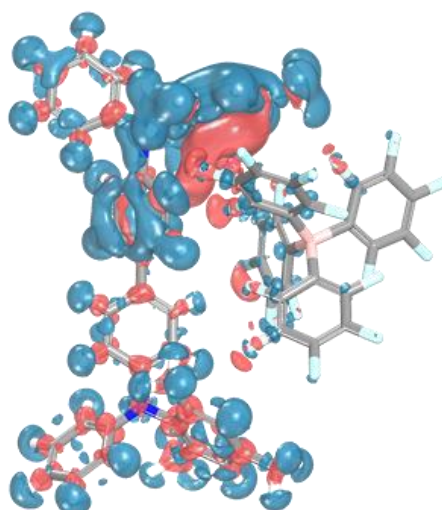

135

136 **Figure S6.** Density functional theory (DFT) calculation results. Differential  
 137 charge map of Li-BCF/PTAA interaction model (red and blue respectively  
 138 represent the accumulation and depletion of electrons).

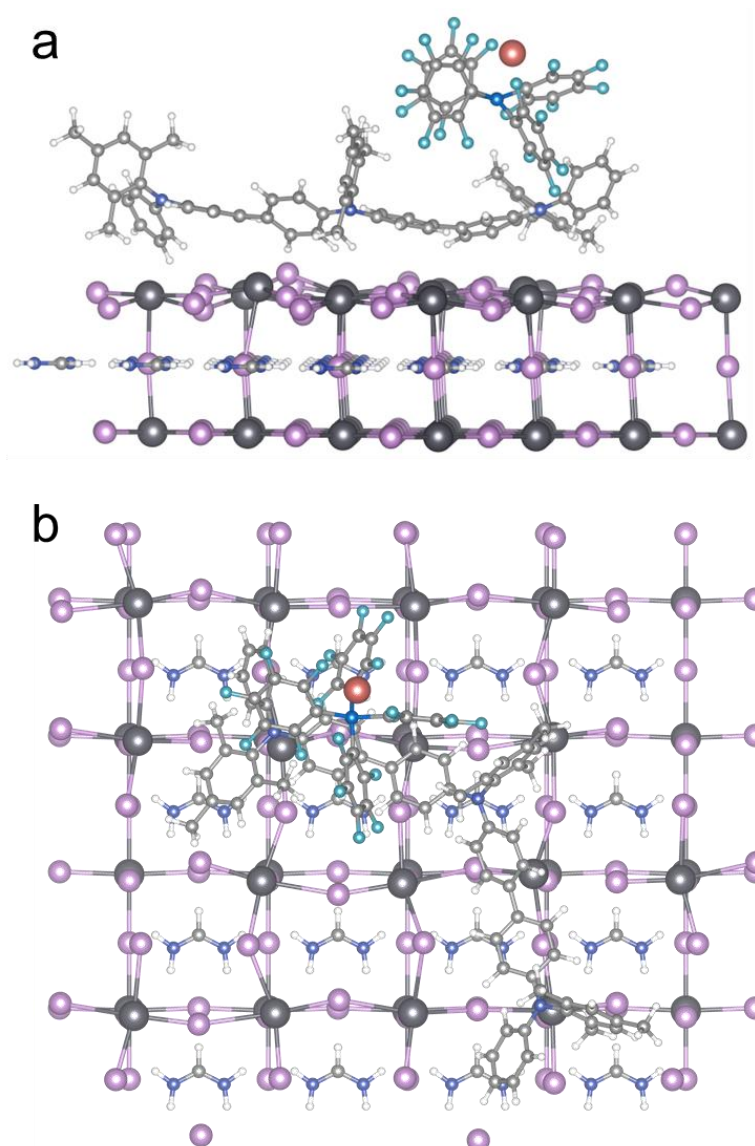

139

140 **Figure S7. Density functional theory (DFT) calculation results. (a) Side**

141 **view and (b) top view of the optimized model of Li-BCF/ PTAA trimer/ PVK lattice.**

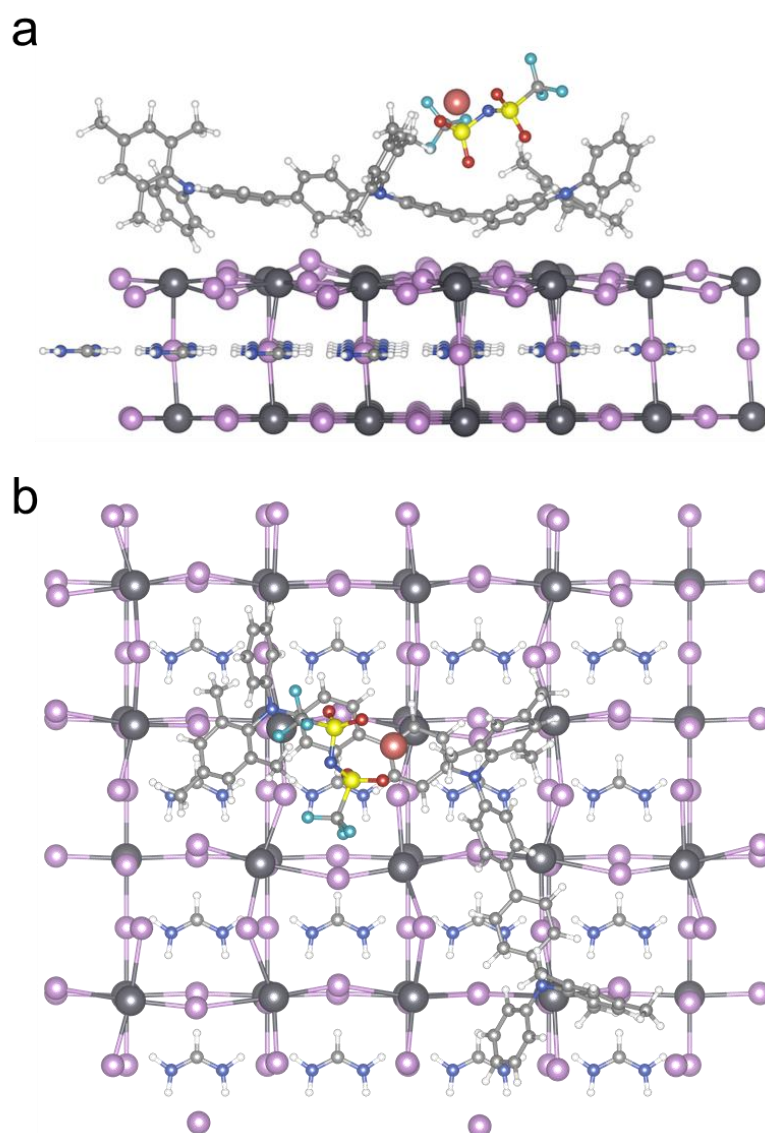

142

143 **Figure S8. Density functional theory (DFT) calculation results. (a) Side**

144 **view and (b) top view of the optimized model of Li-TFSI/ PTAA trimer/ PVK**

145 **lattice.**

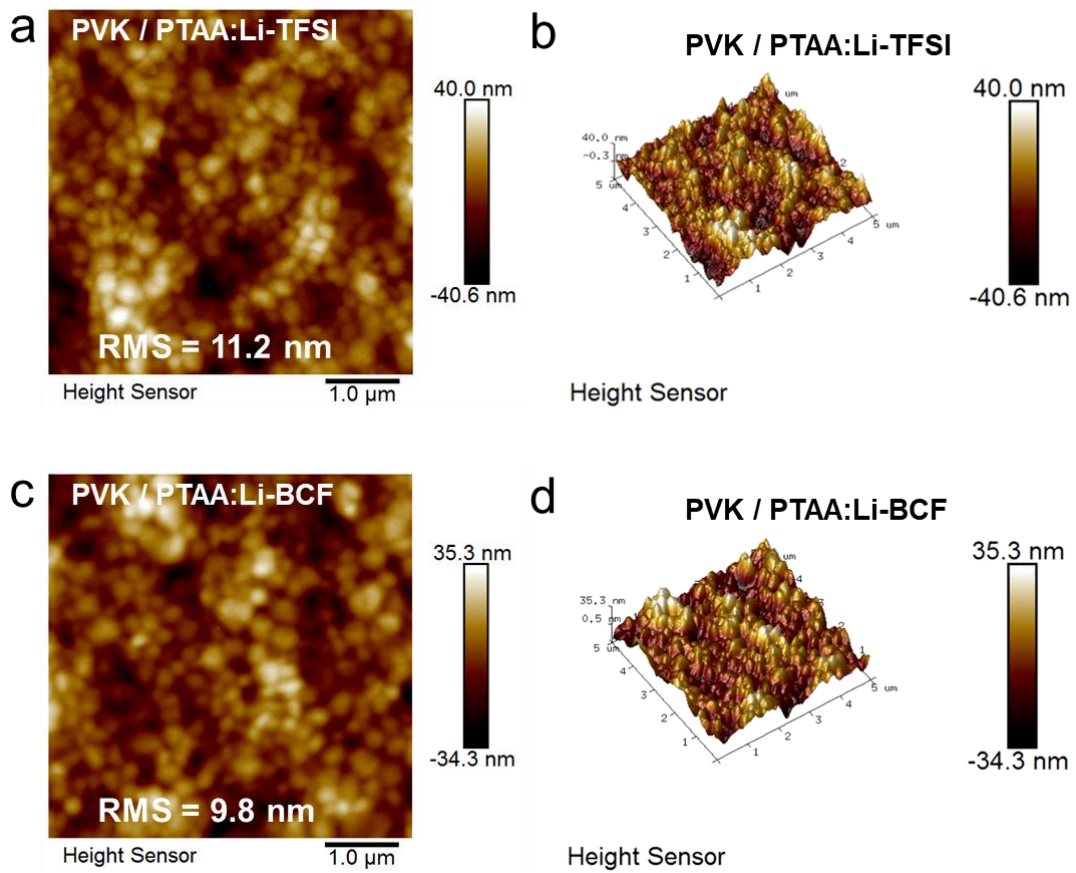

147

148 **Figure S9.** Tapping-mode AFM height and phase images ( $5 \times 5 \mu\text{m}$ ) of  
 149 perovskite capped with (a, b) Li-TFSI doped PTAA film and (c, d) Li-BCF doped  
 150 PTAA film respectively.

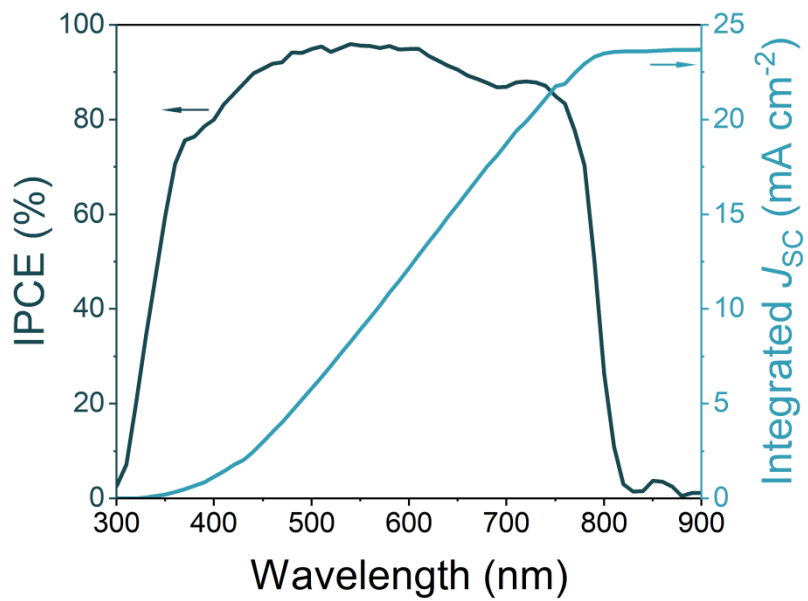

151

152 **Figure S10.** IPCE spectrum and integrated  $J_{sc}$  of Li-BCF doped photovoltaic

153 device.

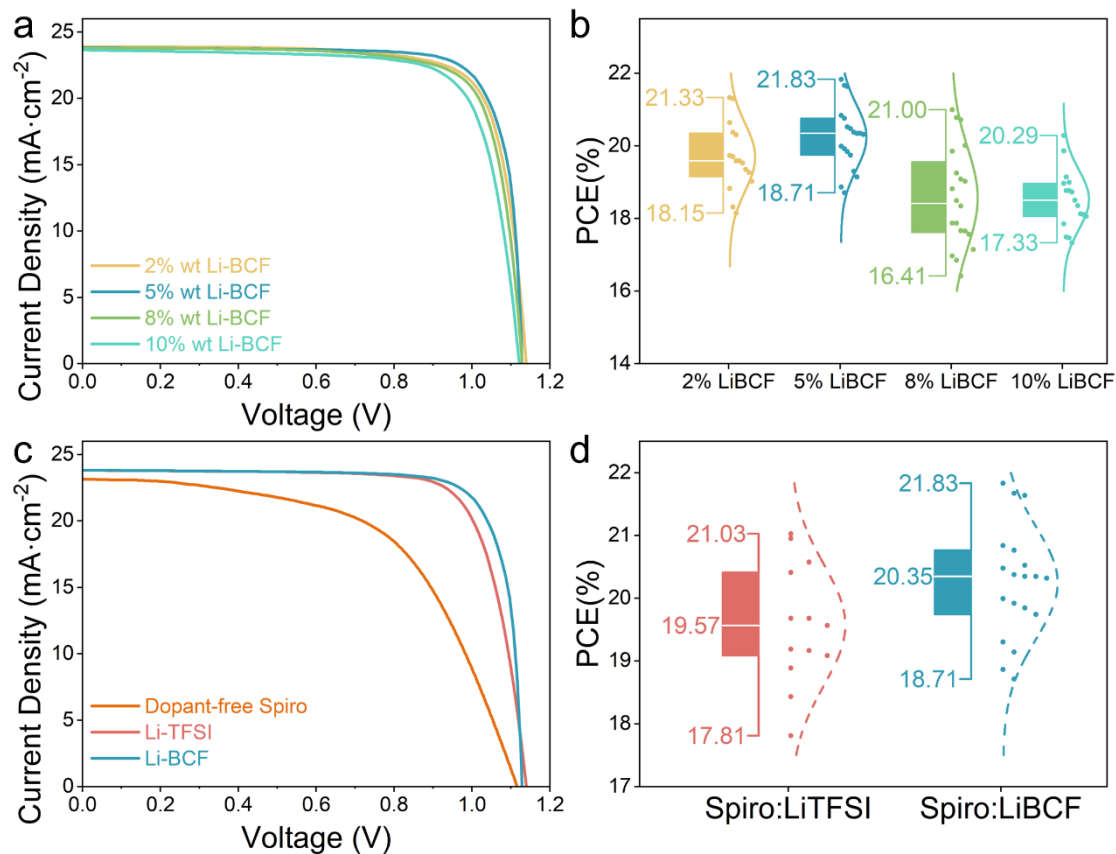

154

155 **Figure S11.** (a) Best *J-V* curves of Spiro-OMeTAD based PSCs and (b) the  
 156 corresponding PCE box plot with different doping concentrations of Li-BCF (2  
 157 wt%, 5 wt%, 8 wt%, 10 wt%). (c) Best *J-V* curves and (d) the corresponding  
 158 PCE box plot of Spiro-OMeTAD devices under different doping systems. The  
 159 numbers in the box plot from top to bottom are the maximum, median, and  
 160 minimum values, respectively.



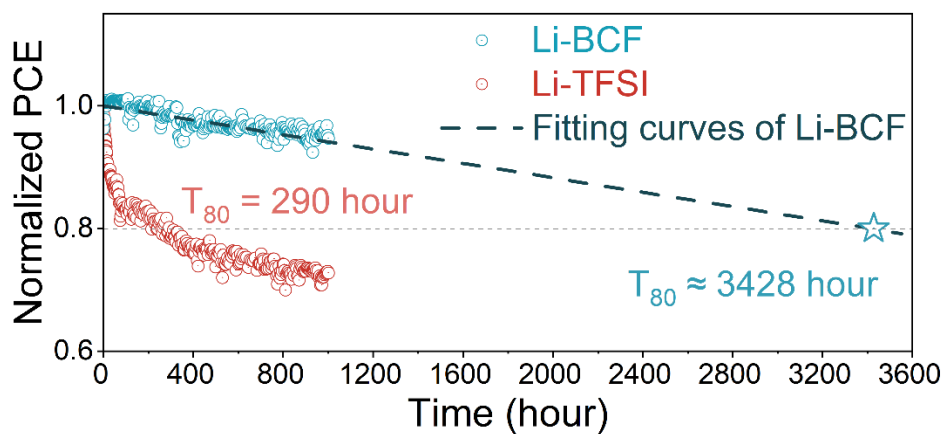

161

162 **Figure S12.** The fitting curve for Li-BCF operational stability data, with detailed  
 163 fitting parameters shown in Table S2.

164

165

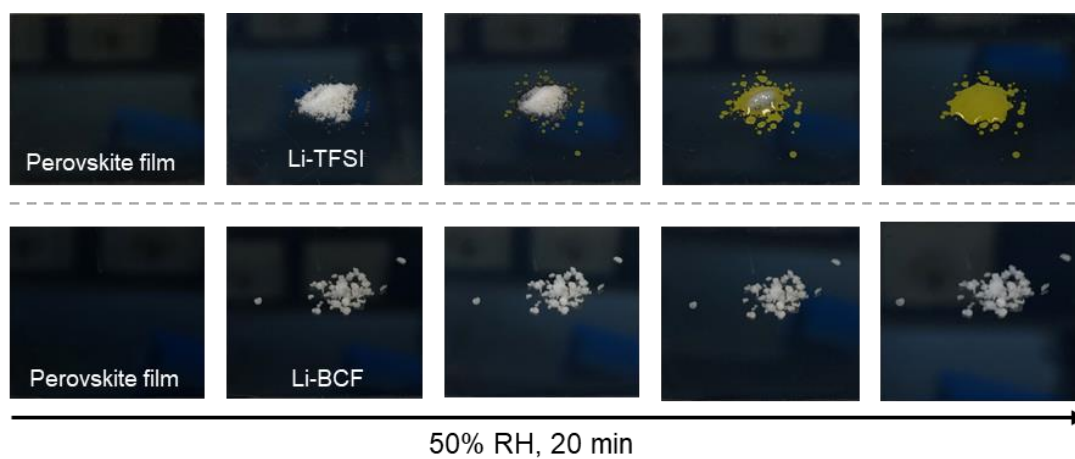

166

167 **Figure S13.** Photos of dopants decomposing perovskite films by absorbing  
 168 moisture in the air.



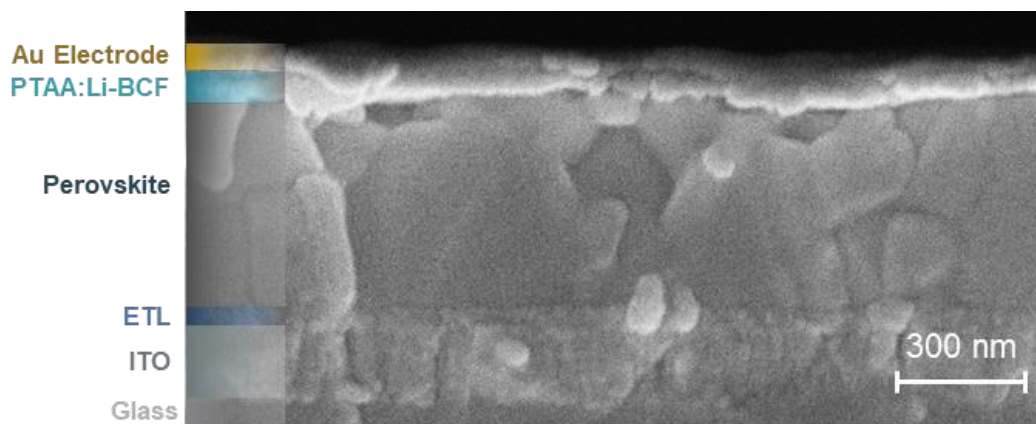

169

170 **Figure S14.** Cross-sectional SEM image of aged Li-BCF-doped device (20

171 days, 25 °C, 50-85% RH).

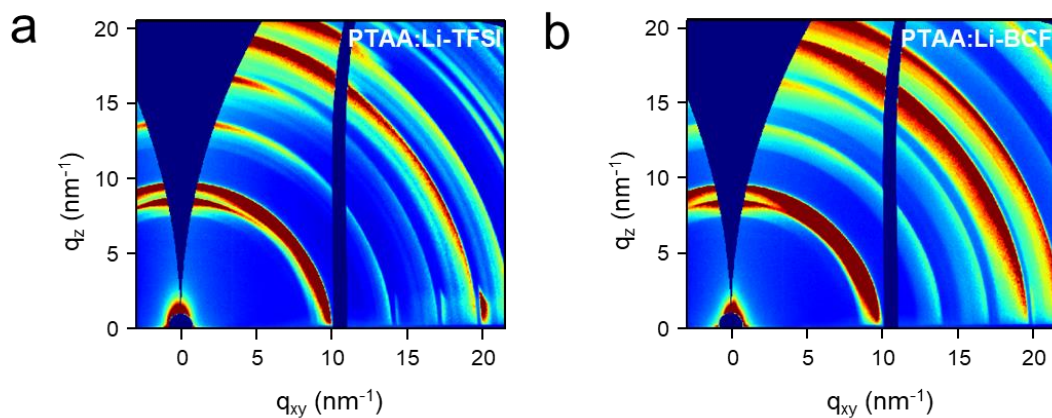

172

173 **Figure S15.** 2D-GIXD data of aged PSCs based on (a) PTAA:Li-TFSI and (b)

174 PTAA:Li-BCF under the ambient conditions without encapsulation for 30 days.

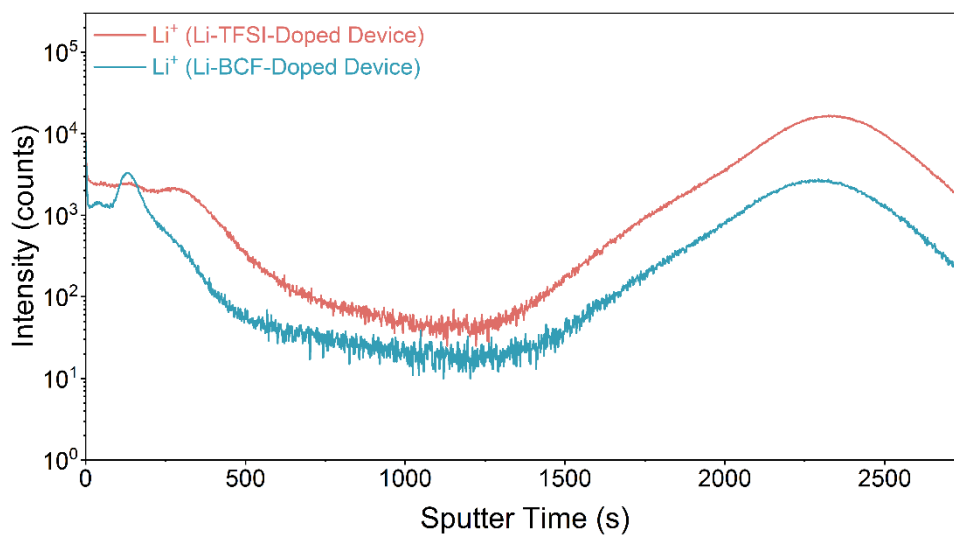

175

176 **Figure S16.** TOF-SIMS results of Li<sup>+</sup> ions in aged devices based on Li-TFSI

177 and Li-BCF.

178 **6. Table S1-3**179 **Table S1.** The fitting parameters of TRPL data through an exponential model.

| Sample                   | $A_1$ | $\tau_1$ (ns) | $A_2$ | $\tau_2$ (ns) | $\tau_{ave}$ (ns) |
|--------------------------|-------|---------------|-------|---------------|-------------------|
| Perovskite               | 0.46  | 69.01         | 0.45  | 395.08        | 345.68            |
| Perovskite/PTAA          | 0.64  | 8.80          | 0.38  | 67.05         | 56.51             |
| Perovskite/PTAA: Li-TFSI | 1.45  | 2.65          | 0.34  | 21.88         | 15.33             |
| Perovskite/PTAA: Li-BCF  | 2.52  | 1.77          | 0.34  | 14.62         | 8.54              |

180

181 **Table S2.** Summary of the photovoltaic parameters of Spiro-OMeTAD based  
182 PSCs with different doping system.

| Doping system               | $J_{sc}$<br>(mA cm <sup>-2</sup> ) | $V_{oc}$<br>(V) | FF<br>(%) | PCE<br>(%) |
|-----------------------------|------------------------------------|-----------------|-----------|------------|
| Dopant-free Spiro-OMeTAD    | 23.20                              | 1.116           | 57.16     | 14.80      |
| Spiro-OMeTAD: Li-TFSI       | 23.81                              | 1.139           | 77.55     | 21.03      |
| Spiro-OMeTAD: 2 wt% Li-BCF  | 23.89                              | 1.138           | 78.46     | 21.33      |
| Spiro-OMeTAD: 5 wt% Li-BCF  | 23.82                              | 1.129           | 81.17     | 21.83      |
| Spiro-OMeTAD: 8 wt% Li-BCF  | 23.77                              | 1.128           | 78.32     | 21.00      |
| Spiro-OMeTAD: 10 wt% Li-BCF | 23.65                              | 1.121           | 76.53     | 20.29      |

183

184

185 **Table S3.** The fitting parameters of Li-BCF operational stability data through an

186 linear model.

| Fitting Parameter            |                                                |
|------------------------------|------------------------------------------------|
| Equation                     | $PCE(t) = a + b t$                             |
| Weight                       | Unweighted                                     |
| Intercept (a)                | $1.00 \pm 9.51 \times 10^{-4}$                 |
| Slope (b)                    | $-5.86 \times 10^{-5} \pm 1.79 \times 10^{-6}$ |
| Sum of Squares of Residuals  | 0.029                                          |
| Pearson's r                  | -0.88                                          |
| Coefficient of Determination | 0.78                                           |

187

188 **References**

- 189 1 P. J. Stephens, F. J. Devlin, C. F. Chabalowski and M. J. Frisch, *The*  
190 *Journal of Physical Chemistry*, 1994, **98**, 11623-11627.
- 191 2 S. Grimme, J. Antony, S. Ehrlich and H. Krieg, *J Chem. Phys.*, 2010, **132**,  
192 154104.
- 193 3 S. Grimme, S. Ehrlich and L. Goerigk, *J. Comput. Chem.*, 2011, **32**, 1456-  
194 1465.
- 195 4 Y. Zhao and D. G. Truhlar, *Theor. Chem. Acc.*, 2008, **120**, 215-241.
- 196 5 B. Delley, *J Chem. Phys.*, 1990, **92**, 508-517.
- 197 6 B. Delley, *J Chem. Phys.*, 2000, **113**, 7756-7764.
- 198 7 J. VandeVondele, M. Krack, F. Mohamed, M. Parrinello, T. Chassaing and  
199 J. Hutter, *Comput. Phys. Commun.*, 2005, **167**, 103-128.
- 200 8 P. Hohenberg and W. Kohn, *Phys. Rev.*, 1964, **136**, B864-B871.
- 201 9 W. Kohn and L. J. Sham, *Phys. Rev.*, 1965, **140**, A1133-A1138.
- 202 10 S. Goedecker, M. Teter and J. Hutter, *Phys. Rev. B*, 1996, **54**, 1703-1710.
- 203 11 C. Hartwigsen, S. Goedecker and J. Hutter, *Phys. Rev. B*, 1998, **58**, 3641-  
204 3662.
- 205 12 M. Krack and M. Parrinello, *Phys. Chem. Chem. Phys.*, 2000, **2**, 2105-  
206 2112.
- 207 13 J. VandeVondele and J. Hutter, *J Chem. Phys.*, 2007, **127**, 114105.

208
